# Supplementary material for: Differential association of Arabidopsis telomeres and centromeres with Histone H3 variants
Source: PubMed Central journal article supplement — Sci Rep. 2013 Feb 4;3:1202. doi: 10.1038/srep01202 (PMC3563029; doi:10.1038/srep01202), 2013-02-04
Supplement: srep01202-s1.pdf [file srep01202-s1.pdf]

# **Differential association of Arabidopsis telomeres and centromeres with Histone H3 variants**

María I. Vaquero-Sedas & Miguel A. Vega-Palas

**Supplementary Table 1.** Number of reads containing the telomeric (CCCTAAA)<sub>6</sub> sequence, the CEN1 and the CEN2 sequences in different ChIP-seq runs from study SRP010096 (Gene Expression Omnibus accession number GSE3840). IP means immunoprecipitate. The number of millions of spots for each run is indicated between parenthesis.

| <b>Marker</b>        | <b>(CCCTAAA)<sub>6</sub></b> | <b>CEN1</b> | <b>CEN2</b> |
|----------------------|------------------------------|-------------|-------------|
| <u>Input of H3.1</u> |                              |             |             |
| -SRX113878(236)      | 12836                        | 44164       | 68521       |
| <u>IP of H3.1</u>    |                              |             |             |
| -SRX113876(245)      | 1150                         | 64280       | 88510       |
| <u>Input of H3.3</u> |                              |             |             |
| -SRX113877(247)      | 10802                        | 37686       | 58337       |
| <u>IP of H3.3</u>    |                              |             |             |
| -SRX112875(244)      | 30170                        | 13616       | 18530       |

**Supplementary Table 2.** Number of reads containing the telomeric (CCCTAAA)<sub>5</sub> sequence, the ITSs sequence (TCTAAACCCTAAACCGTACACC), the CEN1 and the CEN2 sequences in different ChIP-seq runs from study SRP011591 (Gene Expression Omnibus accession number GSE36631). IgG indicates control immunoglobulin G runs. The number of millions of spots for each run is indicated between parenthesis.

| <b>Marker</b>                               | <b>(CCCTAAA)<sub>5</sub></b> | <b>ITSs</b> | <b>CEN1</b> | <b>CEN2</b> |
|---------------------------------------------|------------------------------|-------------|-------------|-------------|
| <u>IgG dividing</u><br>-SRX130308 (27)      | 99                           | 97          | 3078        | 4280        |
| <u>H3.1 dividing</u><br>-SRX130304 (23)     | 50                           | 67          | 2926        | 4624        |
| <u>H3.3 dividing</u><br>-SRX130302 (27)     | 525                          | 30          | 1015        | 1641        |
| <u>IgG non-dividing</u><br>-SRX130316 (27)  | 101                          | 76          | 2995        | 3975        |
| <u>H3.1 non-dividing</u><br>-SRX130312 (24) | 70                           | 62          | 2793        | 4179        |
| <u>H3.3 non-dividing</u><br>-SRX130310 (27) | 598                          | 23          | 856         | 1435        |
